# Supplementary material for: Lrp1 in osteoblasts controls osteoclast activity and protects against osteoporosis by limiting PDGF–RANKL signaling
Source: PubMed Central journal article supplement (PMC5826921; doi:10.1038/s41413-017-0006-3), 2018-02-26
Supplement: 41413_2017_6_MOESM1_ESM.pdf [file 41413_2017_6_MOESM1_ESM.pdf]

**Lrp1 protects against osteoporosis by limiting  
PDGF-RANKL signaling in osteoblasts**

**Bartelt et al.**

**Supplementary Information**

## Bartelt et al. Supplementary Fig. 1

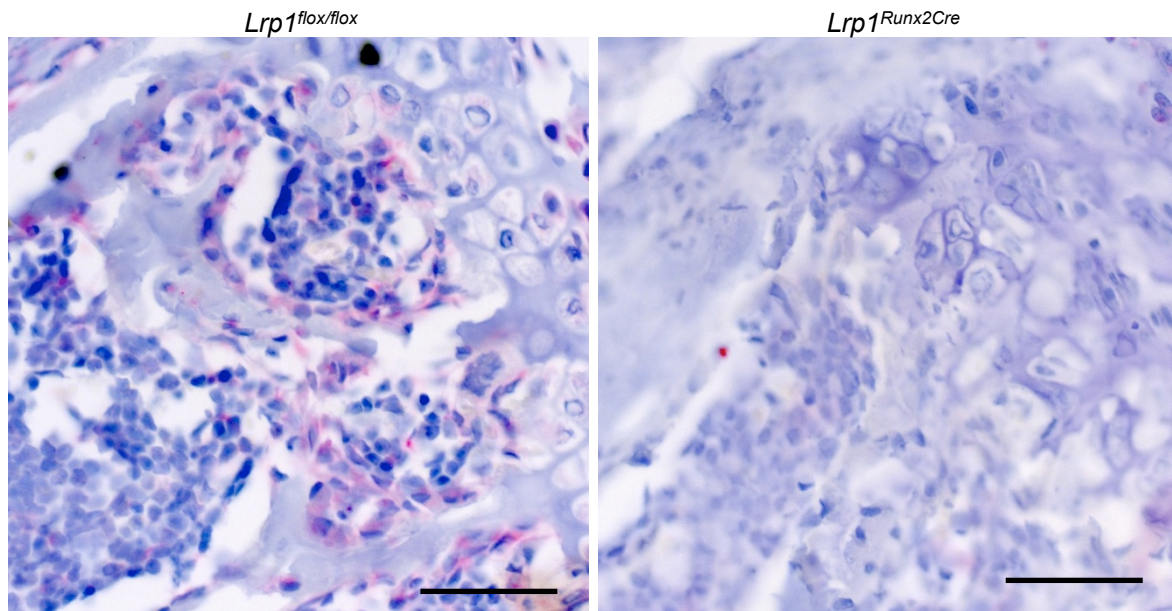

**Supplementary Fig. 1** Bone Lrp1 immunohistochemistry. Metaphyseal trabecular bone from sagittal knee sections of 12 week-old female mice show strong Lrp1 protein expression in osteoblasts in wild-type mice, which was blunted *Lrp1<sup>Runx2Cre</sup>* mice. Bar 50  $\mu$ m.

## Bartelt et al. Supplementary Fig. 2

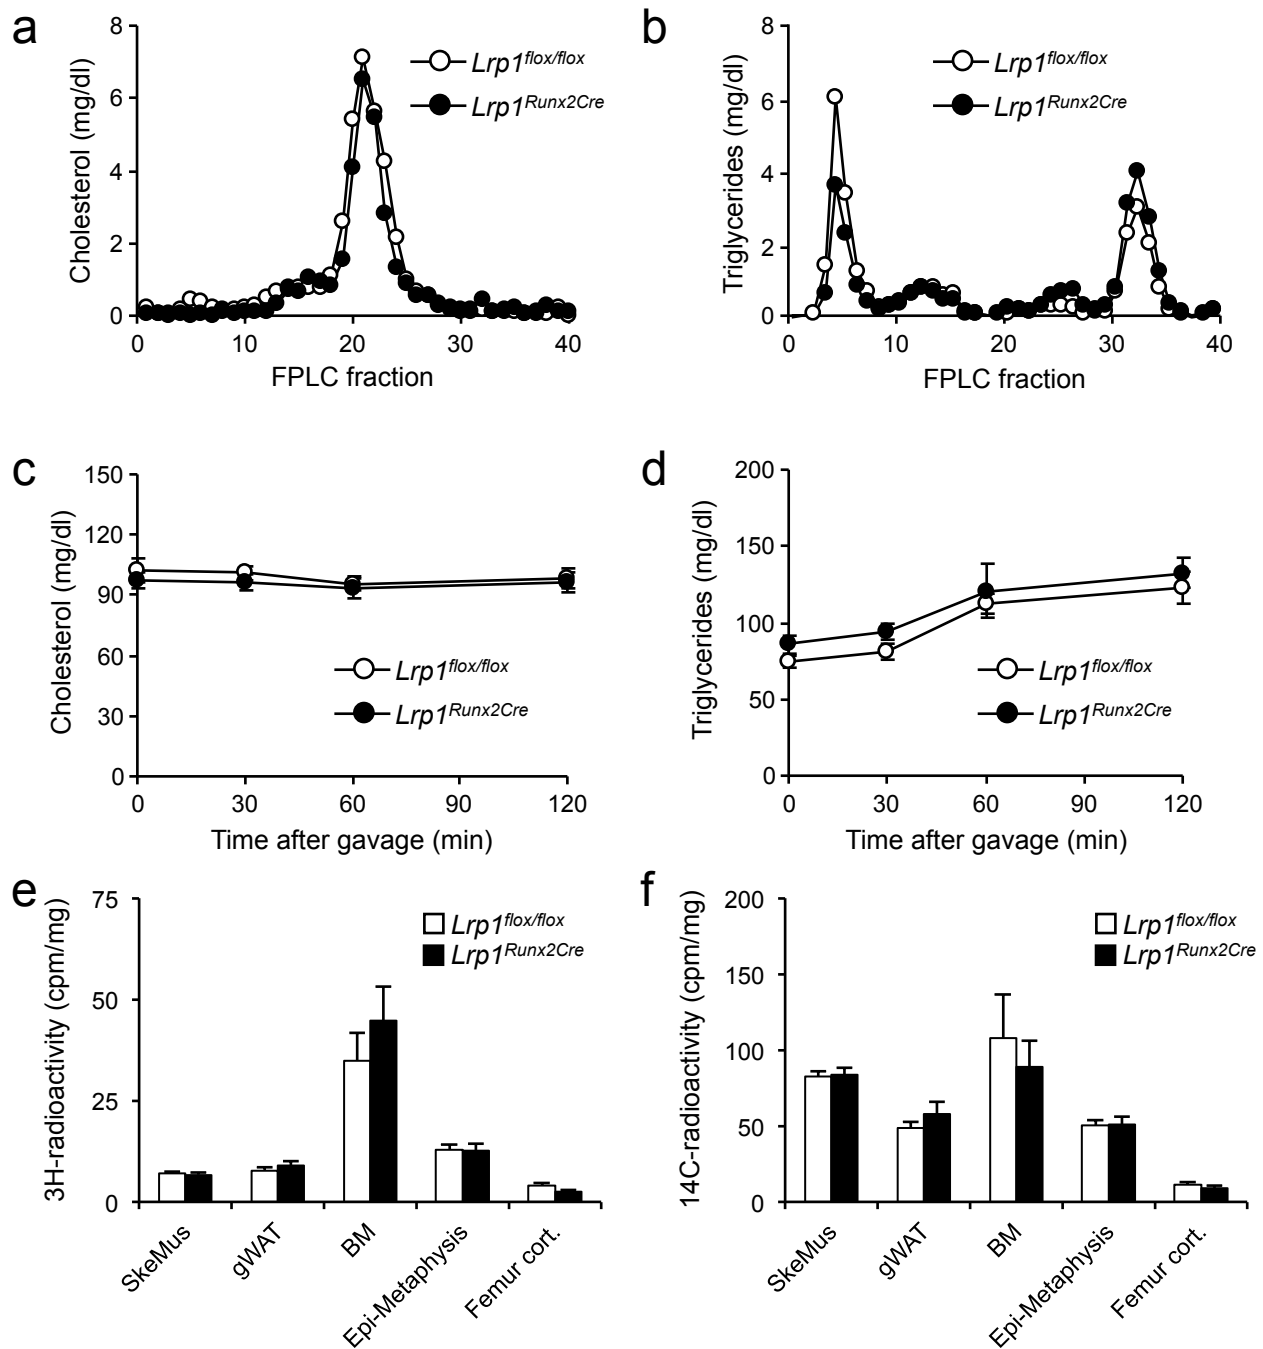

**Supplementary Fig. 2** Lipoprotein metabolism in *Lrp1<sup>Runx2Cre</sup>* mice and controls. **(a)** Serum from fasted 12-week old male was separated by fast performance liquid chromatography (FPLC) and cholesterol as well as **(b)** triglyceride concentrations were determined in each fraction. The lipoprotein profile remains unchanged in *Lrp1<sup>Runx2Cre</sup>* mice compared to controls. **(c)** Also in a dynamic oral fat tolerance test with olive oil, cholesterol as well as **(d)** triglyceride levels remained unchanged in *Lrp1<sup>Runx2Cre</sup>* mice. Means $\pm$ s.e.m., n=6 per group. **(e)** Tissue uptake of fatty acids after <sup>3</sup>H-radiolabeled triolein oral gavage and **(f)** tissue recombinant lipoprotein uptake after i.v. injection in *Lrp1<sup>Runx2Cre</sup>* mice and controls. Means $\pm$ s.e.m., n=10 per group. SkeMus: Quadriceps femoris, gWAT: gonadal white adipose tissue, BM: Bone marrow.

## Bartelt et al. Supplementary Fig. 3

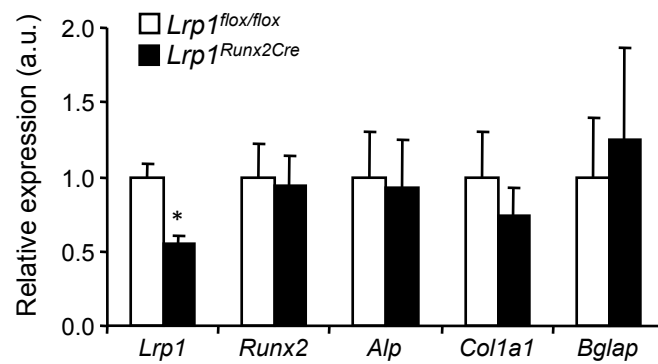

**Supplementary Fig. 3** Primary osteoblasts isolated from *Lrp1<sup>Runx2Cre</sup>* mice and controls. Expression of differentiation markers at d21 in osteoblasts from *Lrp1<sup>Runx2Cre</sup>* mice compared to cells isolated from controls. Means $\pm$ s.e.m. from 4 independent experiments in duplicates or triplicates (\*,  $P < 0.001$  determined by unpaired, two-tailed T-test) (*Alpl*, alkaline phosphatase; *Bglap*, Bone gamma-carboxyglutamate protein; *Col1a1*, collagen, type I, alpha 1; *Lrp1*, LDL receptor-related protein-1; *Runx2*, runt-related transcription factor 2).

## Bartelt et al. Supplementary Fig. 4

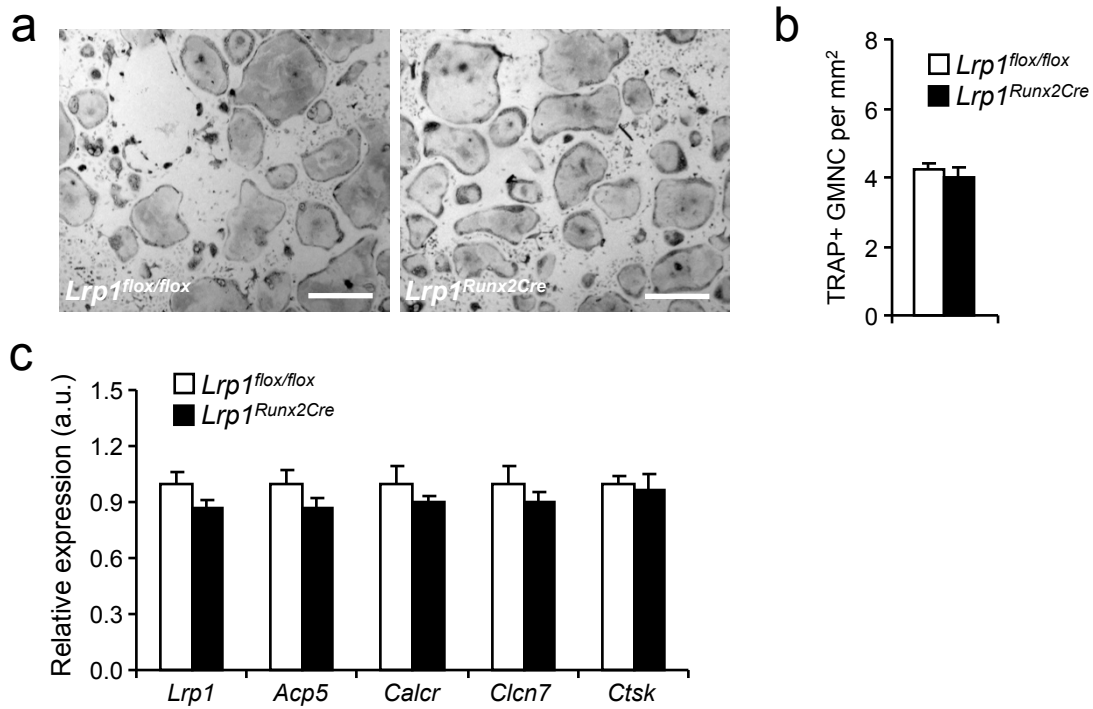

**Supplementary Fig. 4** Primary osteoclasts isolated from *Lrp1<sup>Runx2Cre</sup>* mice and controls. **(a)** Tartrate-resistant acid phosphatase (TRAP) staining in osteoclasts and **(b)** quantification of TRAP-positive giant multinucleated cells (GMNC) was unaltered in *Lrp1<sup>Runx2Cre</sup>* mice compared to controls. Scale bar, 0.5 mm **(c)** Also the expression of genes important for osteoclast function remained unchanged in cells isolated from *Lrp1<sup>Runx2Cre</sup>* mice compared to cells isolated from controls. Means $\pm$ s.e.m. (*Acp5*, acid phosphatase 5, tartrate resistant (encoding TRAP); *Calcr*, calcitonin receptor; *Clcn7*, chloride channel 7; *Ctsk*, cathepsin K; *Lrp1*, LDL receptor-related protein-1).

## Bartelt et al. Supplementary Fig. 5

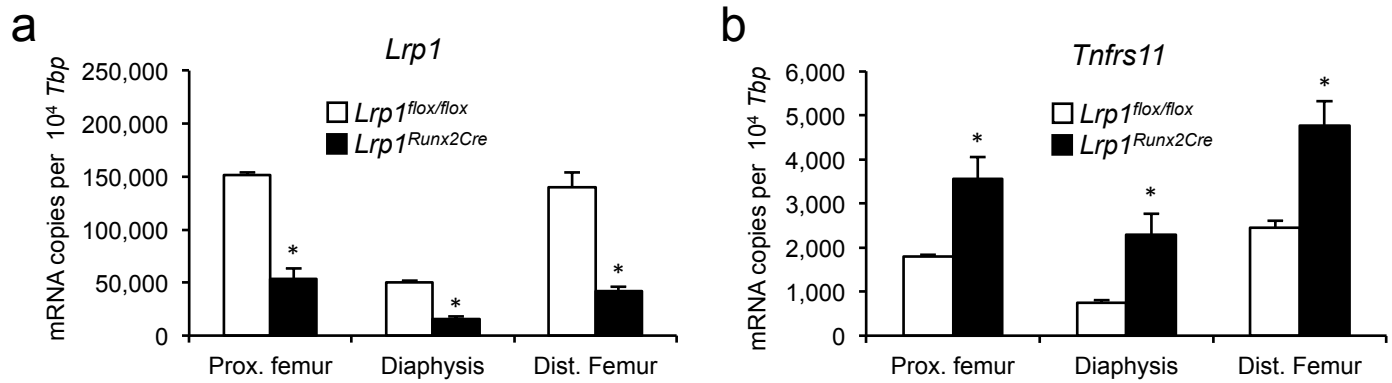

**Supplementary Fig. 5** Gene expression mRNA level of (a) *Lrp1* and (b) *Tnfrs11* (Rankl) in the femoral compartments of 12-week old male *Lrp1*<sup>Runx2Cre</sup> mice and controls (n=3). Means±s.e.m (\*,  $P < 0.01$  determined by unpaired, two-tailed T-test)

## Bartelt et al. Supplementary Fig. 6

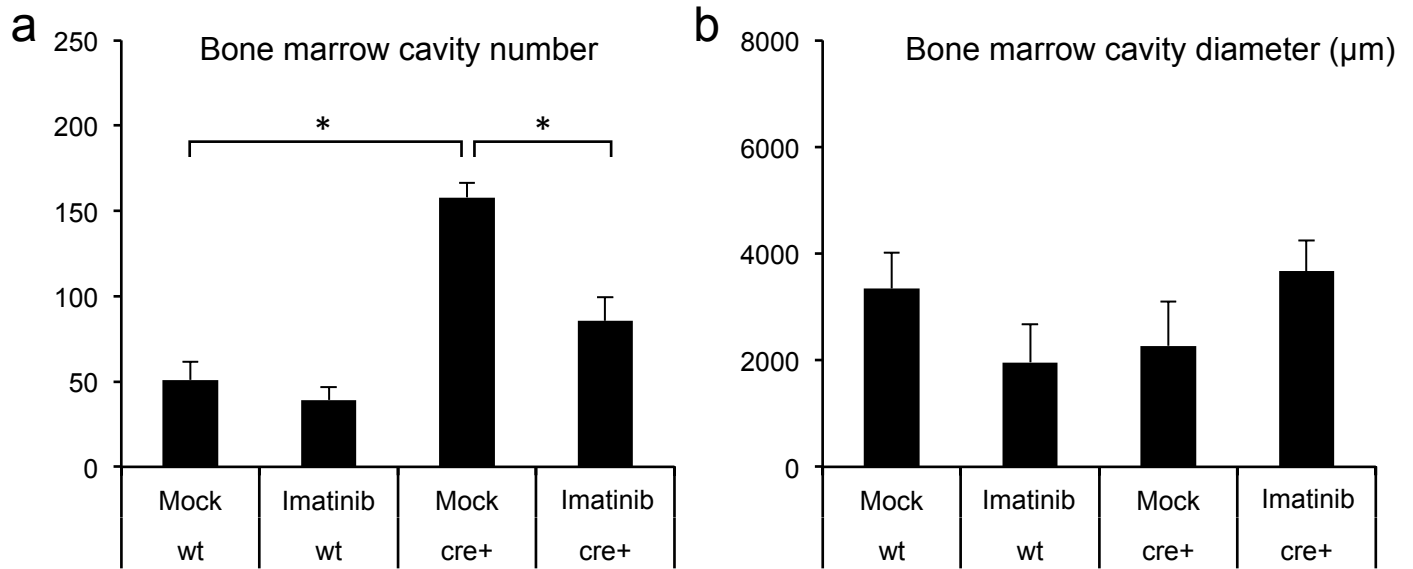

**Supplementary Fig. 6**  $\mu\text{CT}$  analysis of calvaria from female 26 week old *Lrp1<sup>Runx2Cre</sup>* mice (cre+) and littermates controls (WT) that received mock or Imatinib-containing diet (n=4-5). Means $\pm$ s.e.m (\*,  $P < 0.05$  determined by 2-way ANOVA followed by Tukey's test)
